# Supplementary material for: Polytriptycene@CdS double shell hollow spheres with enhanced interfacial charge transfer for highly efficient photocatalytic hydrogen evolution
Source: Royal Society of Chemistry journal article supplement (doi:10.1039/d1ta01081f), 2021-01-01
Supplement: d1ta01081f1.pdf [file d1ta01081f1.pdf]

**Polytritycene@CdS double shell hollow spheres with enhanced interfacial charge transfer for highly-efficient photocatalytic hydrogen evolution**

Qian Liang<sup>a,b</sup>, Lijuan Liu<sup>a</sup>, Zhenyu Wu<sup>b</sup>, Haodong Nie<sup>b</sup>, Hong Shi<sup>b</sup>, Zhongyu Li<sup>a,\*</sup> and Zhenhui Kang<sup>b,c,\*</sup>

*<sup>a</sup>Jiangsu Key Laboratory of Advanced Catalytic Materials and Technology, School of Petrochemical Engineering, Changzhou University, Changzhou 213164, China.*

*<sup>b</sup>Institute of Functional Nano and Soft Materials Laboratory (FUNSOM), Jiangsu Key Laboratory for Carbon-Based Functional Materials & Devices, Soochow University, Suzhou 215123, China.*

*<sup>c</sup>Macao Institute of Materials Science and Engineering, Macau University of Science and Technology, Taipa 999078, Macau SAR, China.*

*\*Correspondence E-mail: zhongyuli@mail.tsinghua.edu.cn, zhkang@suda.edu.cn*

## **1. Experimental materials and methods**

### **1.1 Characterization**

The morphology of as-prepared sample was obtained with field-emission scanning electron microscopy (FESEM, Quanta 200F) and transmission electron microscopy (TEM, JEOL JEM 2100). The crystal phases of CdS@TCP HS were determined by Shimadzu XRD 6000 diffractometer equipped with Cu-K $\alpha$  radiation ( $\lambda = 1.54 \text{ \AA}$ ). The  $^{13}\text{C}$  CP/MAS NMR spectra were obtained using Bruker 400 M. Fourier transform infrared (FT-IR) spectra were obtained on an FTS-3000 spectrophotometer (American Digilab Company). Raman spectra were performing on a Thermo Scientific DXR Raman microscope with an excitation wavelength of 532 nm. The  $\text{N}_2$  adsorption-desorption was detected using a Micromeritics ASAP 2000 at 77 K. UV-Vis diffused reflectance spectra (DRS) were performed using a Hitachi U-4100 spectrophotometer. Photoluminescence (PL) spectra were investigated on a Cary Eclipse fluorescence spectrophotometer. X-ray photoelectron spectra (XPS) were obtained with a ESCALAB 250Xi spectrometer using Al K $\alpha$  X-ray source.

### **1.2 Photocatalytic hydrogen evolution activity**

The photocatalytic hydrogen evolution was carried out in a sealed quartz cylindrical vessel (100 mL) equipped with the flat window (effective irradiation area of  $21.2 \text{ cm}^2$ ). 10 mg of sample was dispersed into 50 mL of distilled water containing  $\text{Na}_2\text{S}$  (0.1 M) and  $\text{Na}_2\text{SO}_3$  (0.1 M) as the sacrificial agent under ultrasound for 30 min. Before reaction proceeding, the vessel was degassed to remove residual air by bubbling argon for 30 min under stirring. The 300 W Xenon lamp assembled with UV cut-off filter ( $\lambda \geq 420 \text{ nm}$ ) was used as a visible-light source, which was 15 cm away from the vessel. The system temperature was kept at  $20^\circ\text{C}$  by circulating cooling water at  $5^\circ\text{C}$ . The amount of produced hydrogen was detected by gas chromatograph (GC 7900) equipped with a thermal conductivity detector (TCD). To investigate the photostability of the chalcogenides, the recycling tests were performed by a similar method using 10 mg sample for a total of 12 h with evacuation every 3 h.

### **1.3 Photoelectrochemical performance**

Photoelectrochemical experiments were measured on a CHI660D electrochemical workstation, containing a conventional three-electrode cell with Pt as counter electrode, Ag/AgCl electrode as reference electrode and FTO glass as working electrode. 0.1 M Na<sub>2</sub>SO<sub>4</sub> solution was used as the electrolyte. The working electrode was prepared by dispersing sample (10 mg) in ethanol (5 mL), and then the mixture was transferred onto the GC electrode and dried at 50°C for 2 h.

### **1.4 The experimental method of transient photovoltage (TPV)**

The TPV measurements were conducted on films samples (1.5 cm × 4 cm) deposited on indium-tin oxide (ITO) glass substrates at room temperature. A 10 mg mL<sup>-1</sup> sample aqueous solution was dripped on the ITO substrate, and then dried in air to obtain the films samples. The working electrode (ITO glass modified with samples) and the counter electrode (Pt wire) were wetted with N<sub>2</sub> or O<sub>2</sub>-saturated acetonitrile and N<sub>2</sub>-saturated acetonitrile/water aqueous (0.5 vol%). Meanwhile, we also measured the powder samples, which were covered on the Pt network (1 cm × 1 cm). The samples were excited by a third-harmonic Nd: YAG laser (Polaris II, New Wave Research, Inc.) with a laser radiation pulse (wavelength 355 nm, pulse width 5 ns).

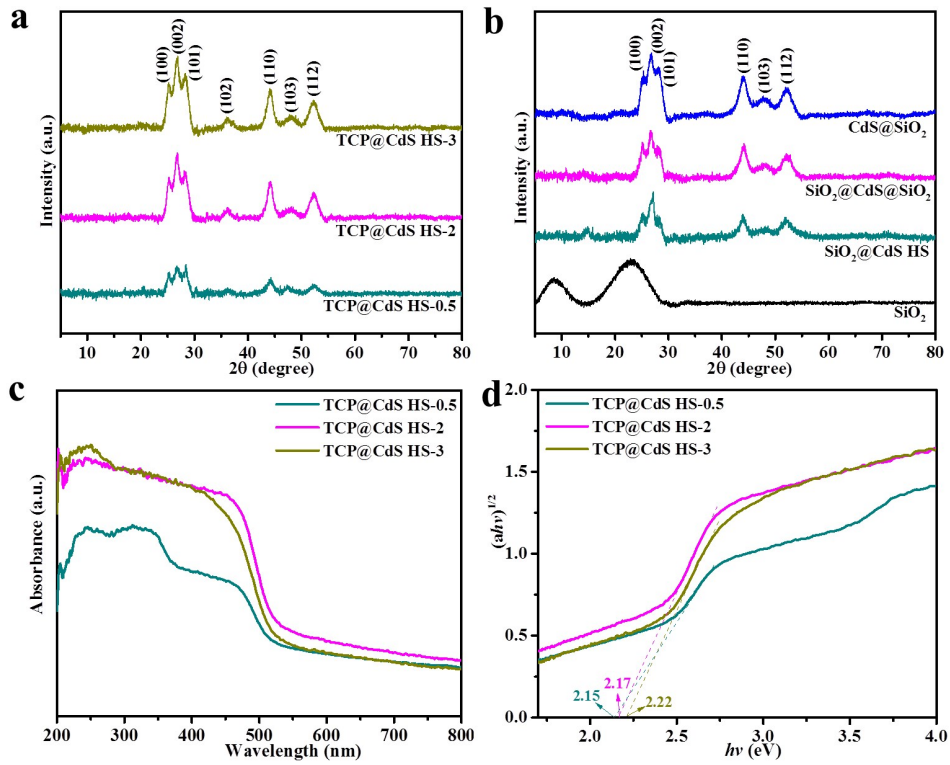

**Figure S1.** (a) XRD patterns of TCP@CdS HS-0.5, TCP@CdS HS-2, TCP@CdS HS-3. (b) XRD patterns of SiO<sub>2</sub>, CdS@SiO<sub>2</sub>, SiO<sub>2</sub>@CdS@SiO<sub>2</sub> and SiO<sub>2</sub>@CdS HS. (c) UV-vis DRS of TCP@CdS HS-0.5, TCP@CdS HS-2, TCP@CdS HS-3. (d) Tauc plots of TCP@CdS HS-0.5, TCP@CdS HS-2, TCP@CdS HS-3.

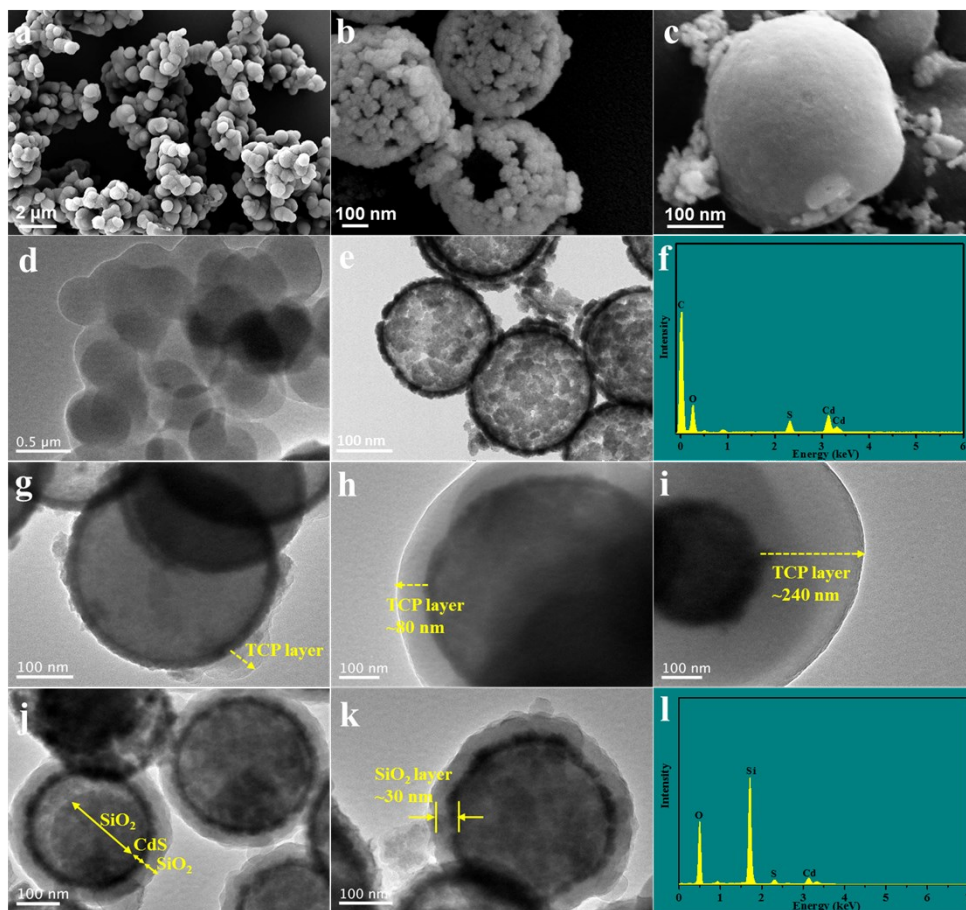

**Figure S2.** SEM images of (a) TCP, (b) CdS HS, (c) TCP@CdS HS-1. TEM images of (d) TCP, (e) CdS HS, (f) EDS spectrum of TCP@CdS HS-1, (g) TCP@CdS HS-3, (h) TCP@CdS HS-2, (i) TCP@CdS HS-0.5, (j) SiO<sub>2</sub>@CdS@SiO<sub>2</sub>, (k) SiO<sub>2</sub>@CdS HS, (l) EDS mapping of SiO<sub>2</sub>@CdS HS.

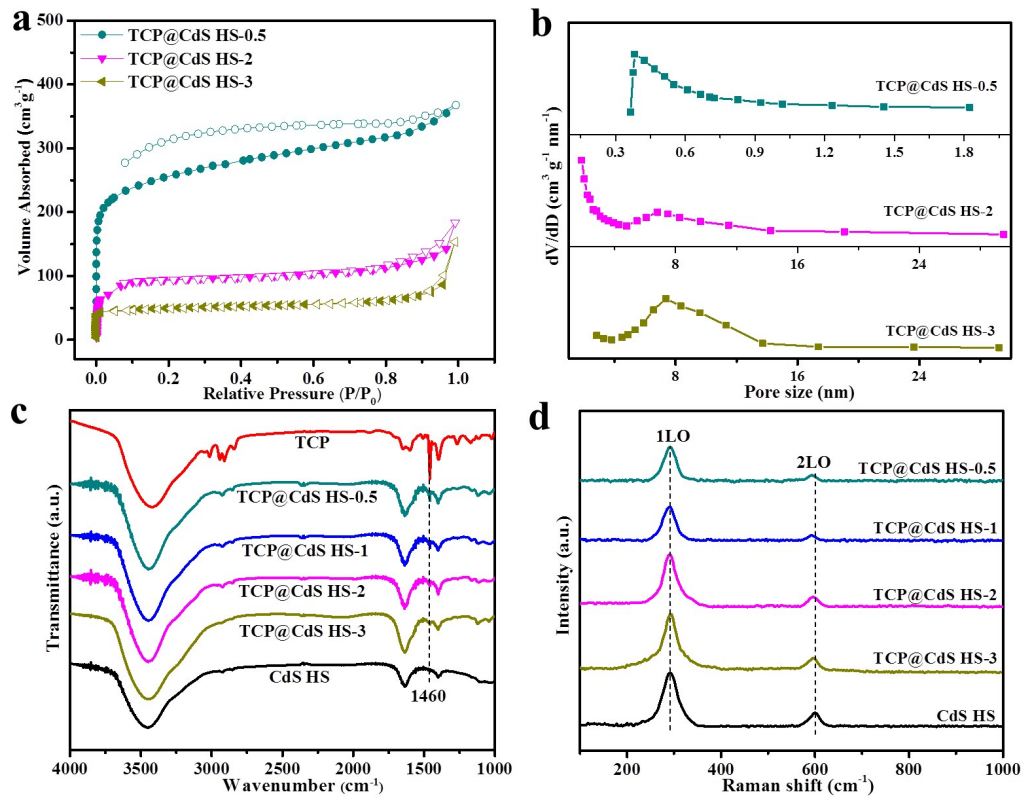

**Figure S3.** (a) Nitrogen adsorption-desorption isotherms of TCP@CdS HS-0.5, TCP@CdS HS-2, TCP@CdS HS-3. (b) Pore-size distribution of TCP@CdS HS-0.5, TCP@CdS HS-2, TCP@CdS HS-3. (c) FT-IR spectra of TCP, CdS HS and TCP@CdS HS composites. (d) Raman spectra of CdS HS and TCP@CdS HS composites.

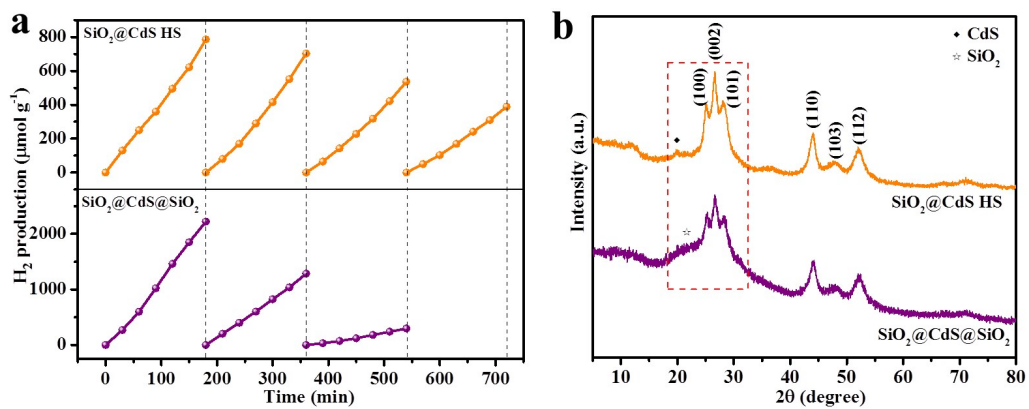

**Figure S4.** (a) Recycling experiments of SiO<sub>2</sub>@CdS@SiO<sub>2</sub> and SiO<sub>2</sub>@CdS HS. (b) XRD patterns of SiO<sub>2</sub>@CdS@SiO<sub>2</sub> and SiO<sub>2</sub>@CdS HS after reaction.

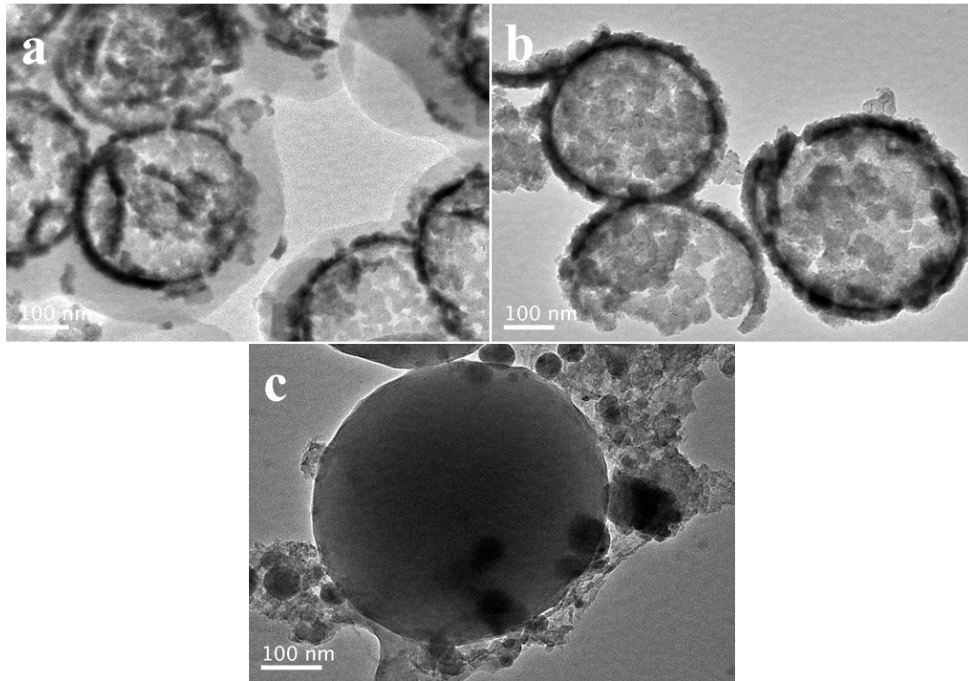

**Figure S5.** TEM images of (a) TCP@CdS HS-1, (b) SiO<sub>2</sub>@CdS HS and (c) SiO<sub>2</sub>@CdS@SiO<sub>2</sub> after reaction.



**Table S1.** Porous characteristics of as-prepared samples.

| Sample         | SBET (m <sup>2</sup> g <sup>-1</sup> ) | S <sub>Langmuir</sub> (m <sup>2</sup> g <sup>-1</sup> ) | Pore volume (cm <sup>3</sup> g <sup>-1</sup> ) |
|----------------|----------------------------------------|---------------------------------------------------------|------------------------------------------------|
| TCP            | 1452.3298                              | 2561.7254                                               | 0.7281                                         |
| TCP@CdS HS-0.5 | 659.2402                               | 1223.8123                                               | 0.3159                                         |
| TCP@CdS HS-1   | 402.6247                               | 785.7812                                                | 0.17353                                        |
| TCP@CdS HS-2   | 245.9532                               | 432.2045                                                | 0.1208                                         |
| TCP@CdS HS-3   | 187.7864                               | 295.4877                                                | 0.0912                                         |
| CdS HS         | 25.7125                                | 52.5485                                                 | 0.0327                                         |
